# Supplementary material for: Statistical Analysis of Molecular Signal Recording
Source: PLOS journal article supplement (doi:10.1371/journal.pcbi.1003145), 2013-07-18
Supplement: S9 (10.1371/journal.pcbi.1003145.s009) [file journal.pcbi.1003145.s009]

### Text S3. Importance of DNAP parameters

Different parameters of nucleotide extension by DNAP can have a large effect on the shape of the time distribution at which nucleotides are written, even with the same mean replication rate. All three parameters ( $\tau_c$ ,  $\tau_p$ , and  $P$ ) affect the average speed with which DNA is replicated and thus the resulting misincorporation probabilities (Fig. S6A&D). Moreover, they each have different effects on the shape of the distribution,  $\gamma_i(t; \theta_1)$ . Longer regular extension durations ( $\tau_c$ ) primarily shift the distribution to the right. Longer pauses ( $\tau_p$ ) lead to a distribution with longer tails on the right hand side (Fig. S6B, green). The proportion of pauses ( $P$ ) scales the weight of the tails (Fig. S6B, red). Thus, the specific, *in vivo*, dynamics of the polymerase can have profound implications on our ability to decode molecular ticker tapes. Fortunately, if a known signal can be applied, the molecular ticker tapes can be used to measure the behavior of the polymerase itself.
